# Supplementary material for: The preparation of Fe/wood-based activated carbon catalyst for phenol hydroxylation from Fe2+ and Fe3+ precursors
Source: Royal Society of Chemistry journal article supplement (doi:10.1039/c4cy01705f), 2015-01-01
Supplement: c4cy01705f1.pdf [file c4cy01705f1.pdf]

# **The preparation of Fe/wood-based activated carbon catalyst for phenol hydroxylation from Fe<sup>2+</sup> and Fe<sup>3+</sup> precursors†**

**Ruiguang Yang, Guiying Li\*, and Changwei Hu\***

*Key Laboratory of Green Chemistry and Technology, Ministry of Education, College of Chemistry, Sichuan University, Chengdu, Sichuan, 610064, China.*

## **Electronic Supplementary Information (ESI)**

### **Contents**

**Fig. S1** DR UV-vis spectra of catalysts: (a) WAC, (b) Fe/WAC/0.89, (c) Fe/WAC/2.76, (d) Fe/WAC/4.82, (e) Fe/WAC/6.55.

**Fig. S2** FTIR spectra of catalysts.

**Fig. S3** HRTEM images of the catalysts: (A, C) Fe/WAC/0.89, (B, D) Fe/WAC/6.55. The scale bars in image (A-D) were 200, 200, 2 and 2 nm, respectively.

**Fig. S4** The decomposition of H<sub>2</sub>O<sub>2</sub> in blank experiment.

**Table S1** Effect of molar ratio of Fe<sup>3+</sup> to Fe<sup>2+</sup> for phenol hydroxylation

**Table S2** Recycling of Fe/WAC/0.89 for phenol hydroxylation

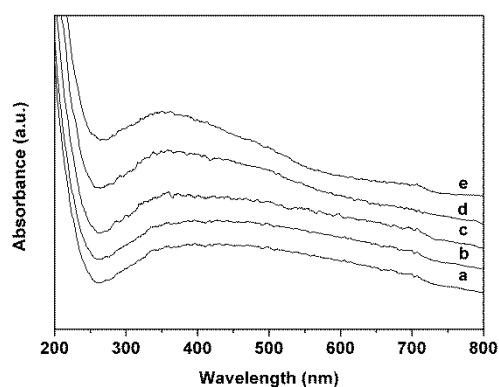

**Fig. S1** DR UV-vis spectra of catalysts: (a) WAC, (b) Fe/WAC/0.89, (c) Fe/WAC/2.76, (d) Fe/WAC/4.82, (e) Fe/WAC/6.55.

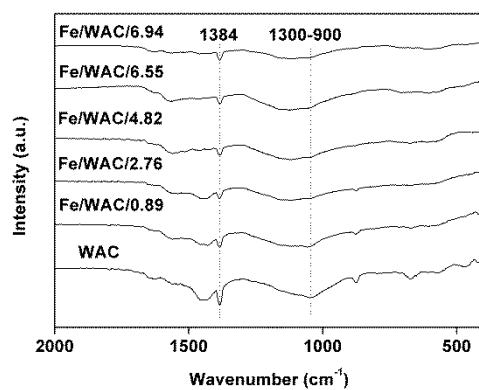

**Fig. S2** FTIR spectra of catalysts.

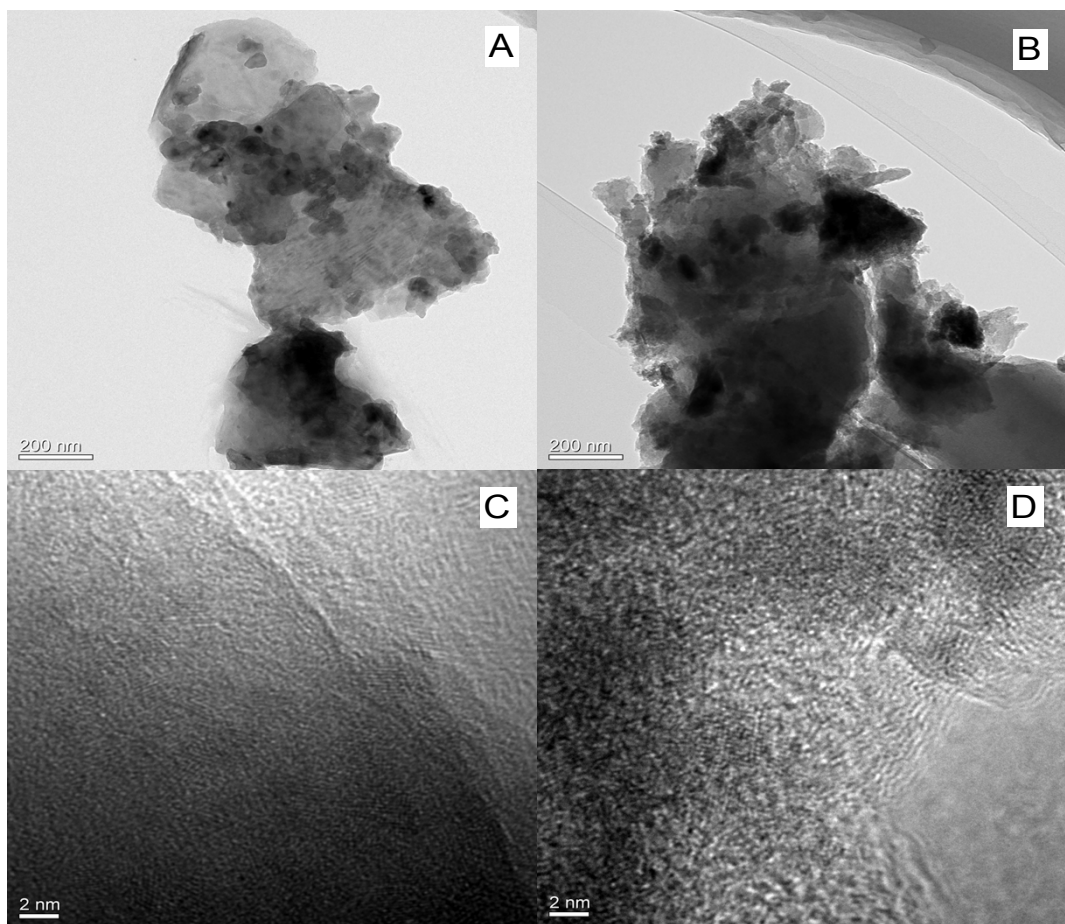

**Fig. S3** HRTEM images of the catalysts: (A, C) Fe/WAC/0.89, (B, D) Fe/WAC/6.55. The scale bars in image (A-D) were 200, 200, 2 and 2 nm, respectively.

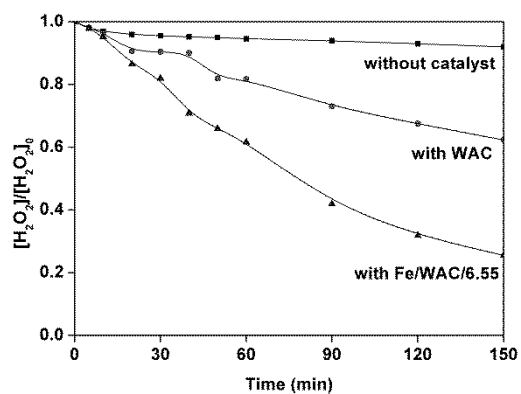

**Fig. S4** The decomposition of  $\text{H}_2\text{O}_2$  in blank experiment.

**Table S1** Effect of molar ratio of Fe<sup>3+</sup> to Fe<sup>2+</sup> for phenol hydroxylation <sup>a</sup>

| Fe <sup>3+</sup> /Fe <sup>2+</sup> | <i>X</i> <sub>Ph</sub> (%) | <i>S</i> <sub>DHB</sub> (%) | <i>Y</i> <sub>DHB</sub> (%) | Yield of product (%) |      |     |        |
|------------------------------------|----------------------------|-----------------------------|-----------------------------|----------------------|------|-----|--------|
|                                    |                            |                             |                             | CAT                  | HQ   | BQ  | Others |
| 0/1                                | 22.9                       | 49.6                        | 11.4                        | 3.4                  | 8.0  | 1.9 | 9.6    |
| 1/1                                | 50.1                       | 79.8                        | 40.0                        | 21.7                 | 18.3 | 1.8 | 8.3    |
| 2/1                                | 51.1                       | 80.6                        | 41.2                        | 22.0                 | 19.2 | 1.7 | 8.2    |
| 3/1                                | 50.6                       | 79.6                        | 40.3                        | 21.8                 | 18.5 | 1.7 | 8.6    |
| 4/1                                | 51.5                       | 79.8                        | 41.1                        | 22.1                 | 19.0 | 1.8 | 8.6    |
| 1/0                                | 23.7                       | 52.8                        | 12.5                        | 3.9                  | 8.6  | 2.1 | 9.1    |

<sup>a</sup> Reaction condition: 0.05 g of catalyst, 0.48 g of phenol (5 mmol), 0.50 g of 30 wt% aqueous H<sub>2</sub>O<sub>2</sub> (5 mmol), 10 ml water, reaction temperature 313 K, reaction time 40 min.

**Table S2** Recycling of Fe/WAC/0.89 for phenol hydroxylation <sup>a</sup>

| Catalyst         | <i>X</i> <sub>Ph</sub> (%) | <i>S</i> <sub>DHB</sub> (%) | <i>Y</i> <sub>DHB</sub> (%) | Yield of product (%) |     |     |        | Fe content (wt%) |
|------------------|----------------------------|-----------------------------|-----------------------------|----------------------|-----|-----|--------|------------------|
|                  |                            |                             |                             | CAT                  | HQ  | BQ  | Others |                  |
| BR <sup>b</sup>  | 25.5                       | 67.5                        | 17.2                        | 9.3                  | 7.9 | 3.3 | 5.0    | 0.89             |
| AR1 <sup>c</sup> | 23.0                       | 66.1                        | 15.2                        | 8.4                  | 6.8 | 3.4 | 4.4    | 0.71             |
| AR2              | 10.8                       | 46.3                        | 5.0                         | 3.6                  | 1.4 | 2.0 | 3.8    | 0.65             |
| AR3              | 5.0                        | 46.0                        | 2.3                         | 1.8                  | 0.5 | 1.1 | 0.3    | 0.51             |

<sup>a</sup> Reaction condition: 0.05 g of Fe/WAC/0.89, 0.48 g of phenol (5 mmol), 0.50 g of 30 wt% aqueous H<sub>2</sub>O<sub>2</sub> (5 mmol), 10 ml water, reaction temperature 313 K, reaction time 40 min. <sup>b</sup> BR meant before reaction. <sup>c</sup> AR1 meant after once run, ARN means after N times run.
